# Supplementary material for: Prognostic Relevance of Nuclear Receptors in Relation to Peritumoral Inflammation and Tumor Infiltration by Lymphocytes in Breast Cancer
Source: MDPI journal article supplement (doi:10.3390/cancers14194561), 2022-09-20
Supplement: s1 [file s1]

**Supp. Figure S1:** Kaplan-Meier survival analyses for cytoplasmic RXR $\alpha$  in relation to the level of peritumoral inflammation on overall survival (OS).

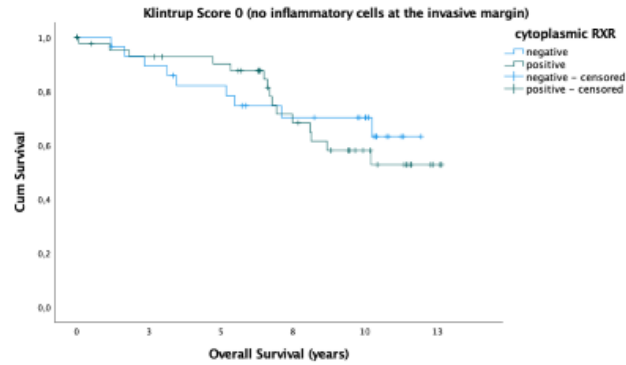

p = 0.681

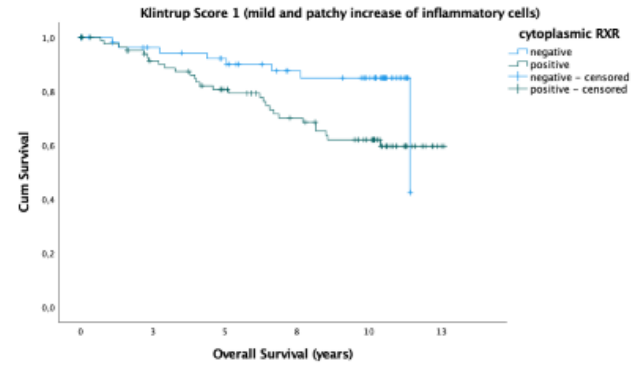

p = 0.021

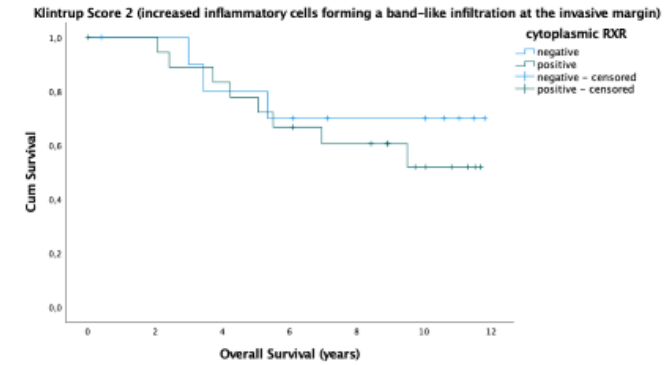

p = 0.401

**Supp. Figure S2:** Kaplan-Meier survival analyses for cytoplasmic LXR in relation to the level of peritumoral inflammation on overall survival (OS).

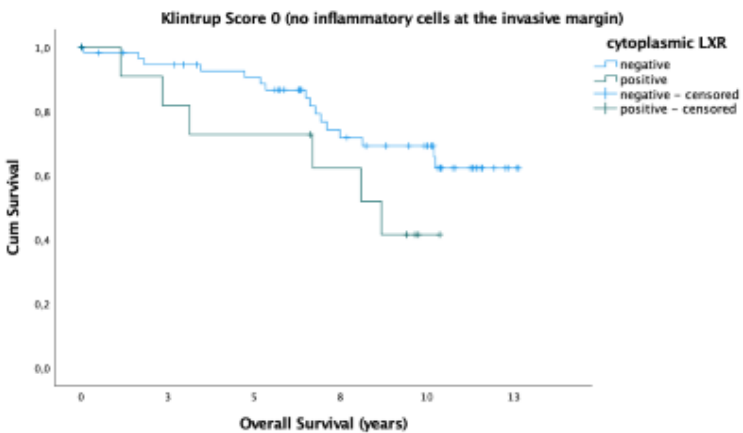

$p = 0.112$

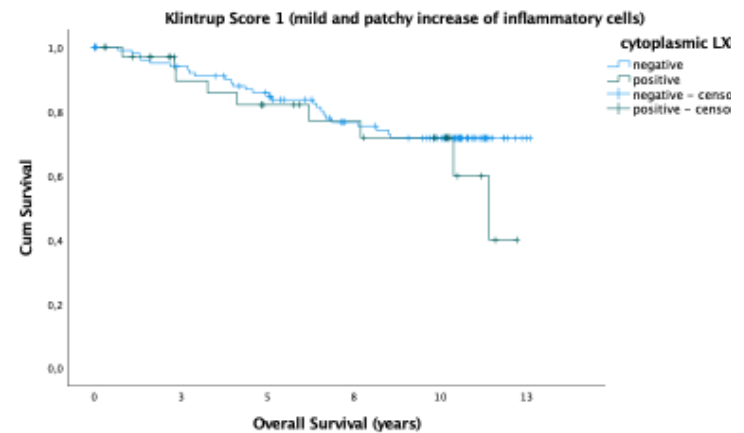

$p = 0.434$

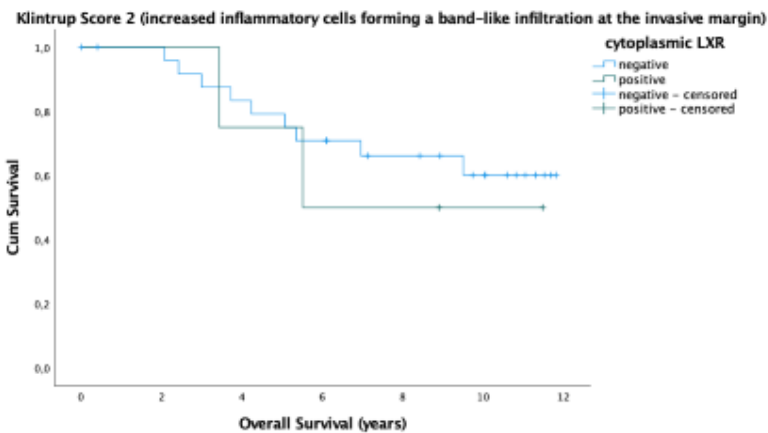

$p = 0.653$

**Supp. Figure S3:** Kaplan-Meier survival analyses for cytoplasmic AHR in relation to the level of peritumoral inflammation on overall survival (OS).

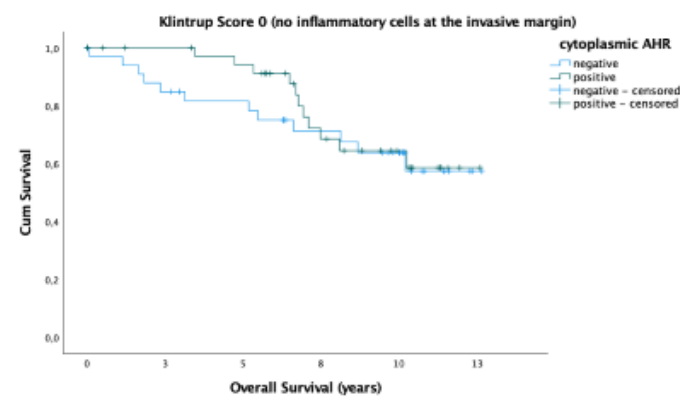

$p = 0.595$

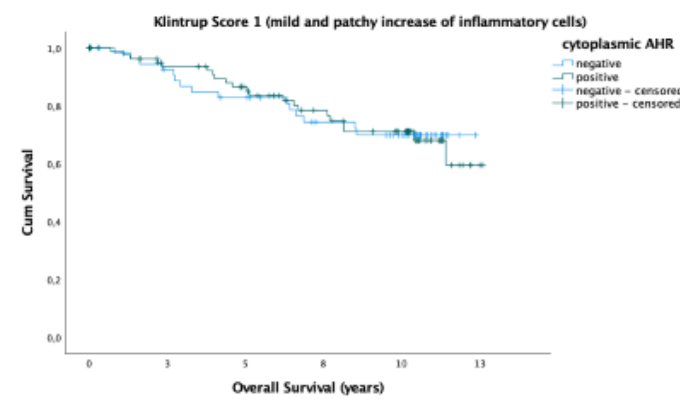

$p = 0.961$

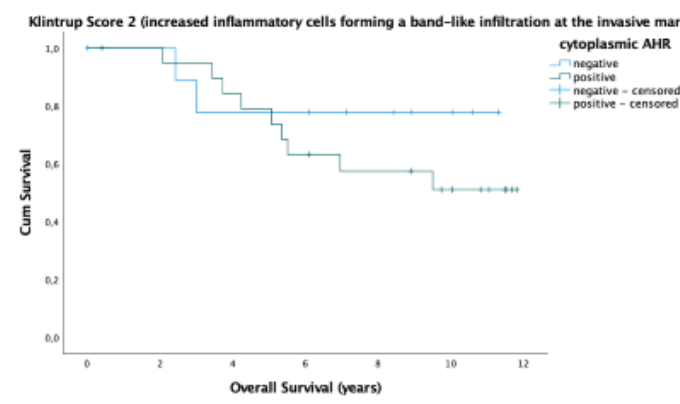

$p = 0.347$

**Supp. Table S1**  
Clinical and pathological  
characteristics of all patients

| Clinical and Pathological Characteristics | n = 264 |
|-------------------------------------------|---------|
| Age, median (years)                       | 57.54   |
| Molecular subtype (IHC)                   |         |
| Luminal A (Ki67 ≤ 14%)                    | 140     |
| Luminal B (Ki67 > 14%)                    | 54      |
| HER2 positive                             | 19      |
| HER2 non luminal                          | 7       |
| Triple negative                           | 34      |
| Unknown                                   | 10      |
| Grade                                     |         |
| I                                         | 11      |
| II                                        | 92      |
| III                                       | 42      |
| Unknown                                   | 119     |
| Tumor size                                |         |
| pT1                                       | 164     |
| pT2                                       | 78      |
| pT3                                       | 3       |
| pT4                                       | 10      |
| Unknown                                   | 9       |
| Lymph node metastasis                     |         |
| Yes                                       | 112     |
| No                                        | 138     |
| Unknown                                   | 14      |
| ER status                                 |         |
| Positive                                  | 204     |
| Negative                                  | 51      |
| Unknown                                   | 9       |
| PR status                                 |         |
| Positive                                  | 145     |
| Negative                                  | 110     |
| Unknown                                   | 9       |

**Supp. Table S2:** Correlation between Salgado and Klintrup Score

|          |   | Salgado |              |      |       |
|----------|---|---------|--------------|------|-------|
|          |   | <10%    | >10 and <30% | >30% | Total |
| Klintrup | 0 | 60      | 14           | 0    | 74    |
|          | 1 | 22      | 98           | 23   | 143   |
|          | 2 | 0       | 0            | 30   | 30    |
| Total    |   | 82      | 112          | 53   | 247   |

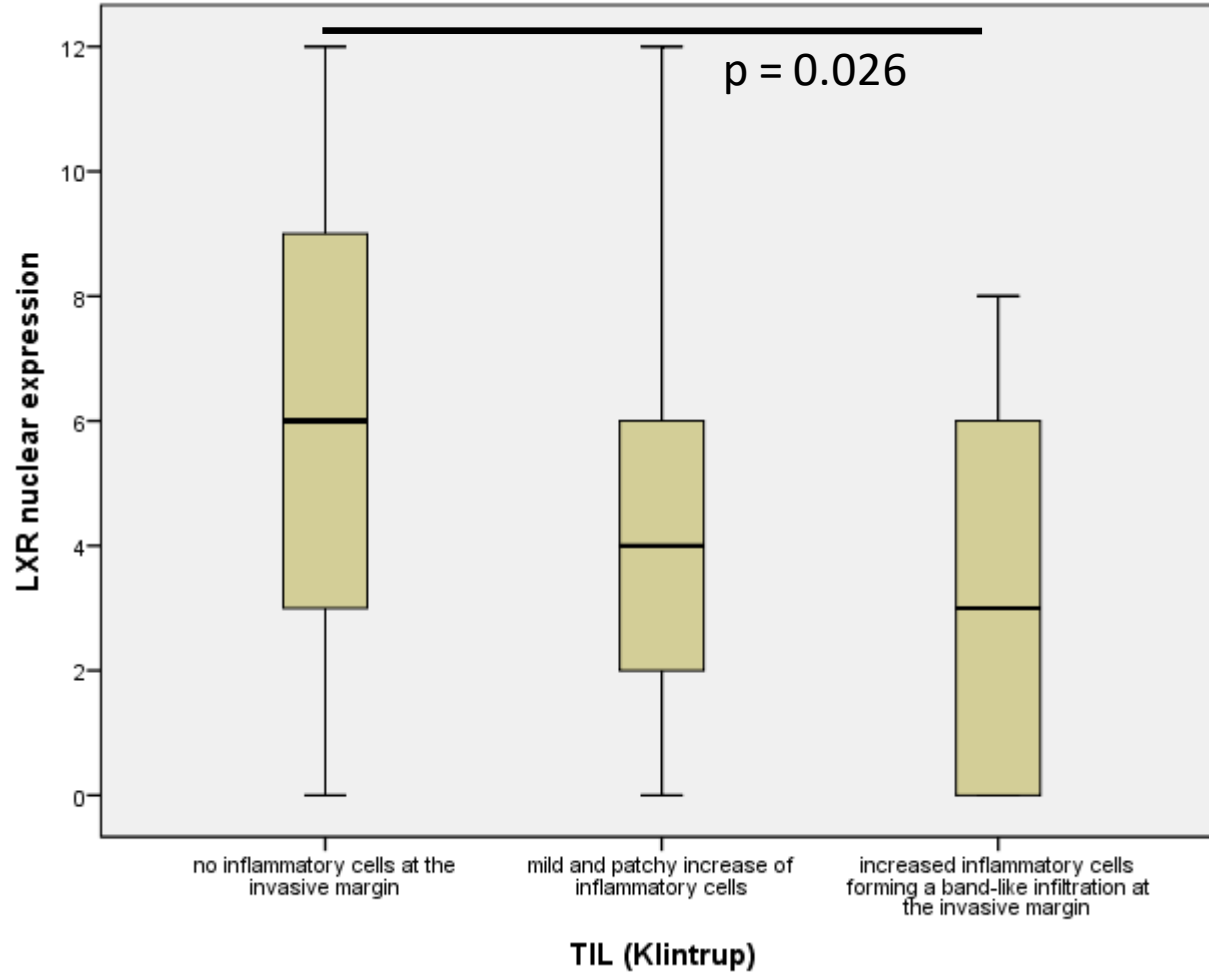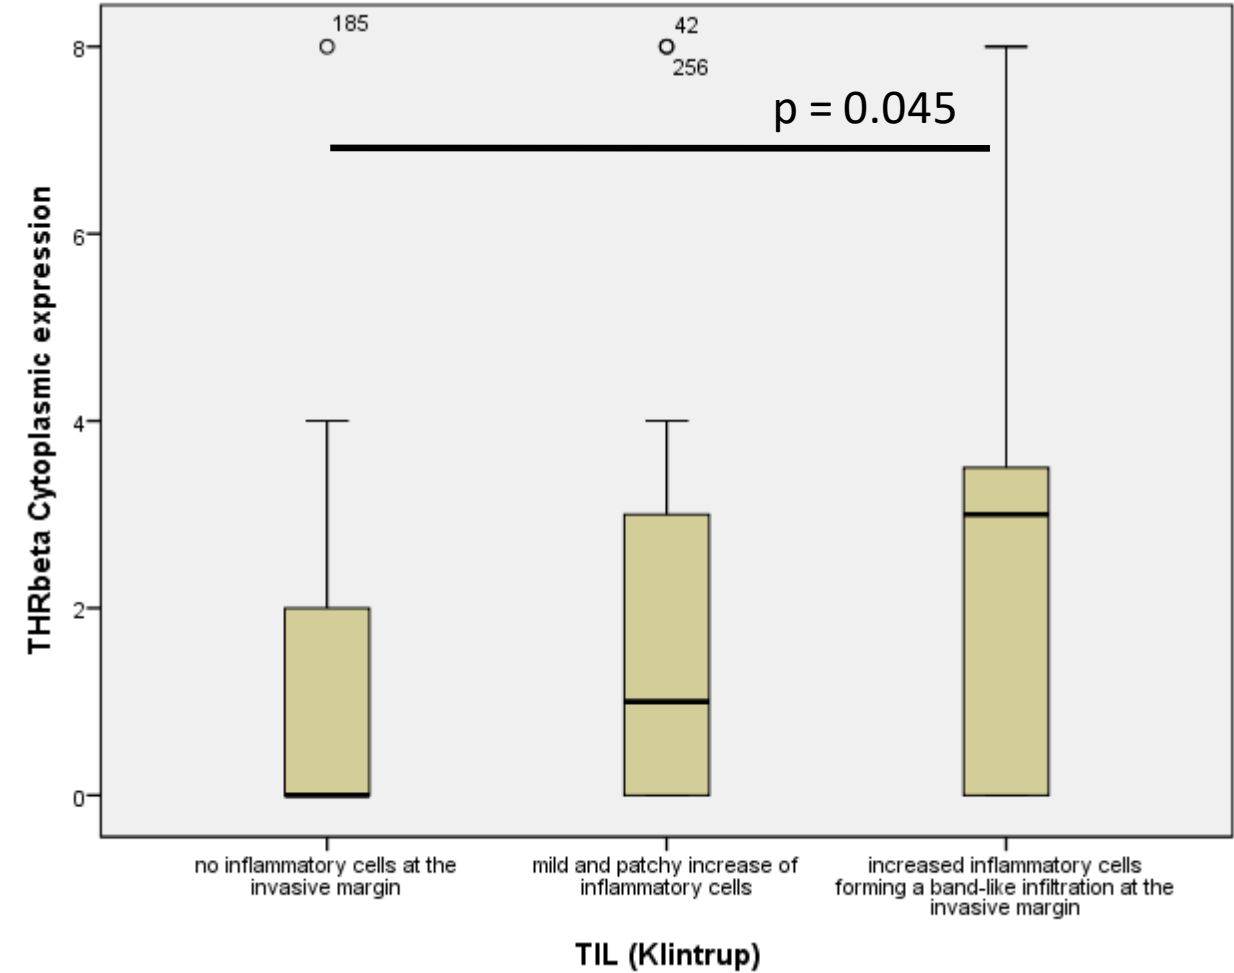

**Supp. Figure S4:** Expression of LXR in the nucleus is significantly decreased from cases with no peritumoral infiltration of immune cells to cases with increased numbers of infiltrating immune cells. In addition, expression of cytoplasmic expressed thyroid hormone receptor beta increases from cases with no immune cell infiltration to cases with increased infiltration of inflammatory cells.
